# Supplementary material
Source: Preprints.org preprint supplement (doi:10.20944/preprints202009.0191.v1)
Supplement: Supplementary file 1 [file Table S1.xlsx]

## Sheet: ECN
Composition	Plant	ECN	Rt neg (min)	Rt pos (min)
A-NAc-t18:1-h16:0	Spinach	32	8	8
A-NAc-t18:1-h16:0	Salad	32	8.01	8
A-NAc-t18:1-h22:0	Spinach	38	14.25	14.25
A-NAc-t18:1-h22:0	Salad	38	14.19	14.26
A-NAc-t18:1-h22:0	Raspberry	38	14.21	14.19
A-NAc-t18:2-h24:0	Raspberry	38	14.98	14.97
A-NAc-t18:1-h23:0	Spinach	39	15.64	15.65
A-NAc-t18:1-h24:0	Spinach	40	16.98	16.98
A-NAc-t18:1-h24:0	Salad	40	16.98	16.94
A-NAc-t18:1-h24:0	Raspberry	40	16.96	16.94
A-NAc-t18:1-h25:0	Spinach	41	18.41	18.41
A-NAc-t18:0-h24:0	Raspberry	42	17.94	18.17
A-NAc-t18:1-h26:0	Spinach	42	19.75	19.75
Composition	Plants	ECN	Rt neg (min)	Rt pos (min)
A-NH2-d18:2-16:0	Raspberry	30	9.89	9.89
A-NH2-t18:1-h16:0	Salad	32	8.64	8.52
A-NH2-t34:1	Raspberry	32	10.27	10.27
A-NH2-d18:1-16:0	Raspberry	32	10.89	10.9
A-NH2-t34:0	Raspberry	34	10.91	10.92
A-NH2-t18:2-h22:0	Raspberry	36	13.42	13.42
A-NH2-t18:2-h23:0	Raspberry	37	14.77	14.8
A-NH2-t18:1-h22:0	Spinach	38	15.56	15.52
A-NH2-t18:1-h22:0	Salad	38	15.51	15.49
A-NH2-t18:1-h22:0	Raspberry	38	15.41	15.25
A-NH2-t18:2-h24:0	Raspberry	38	15.98	16.25
A-NH2-t18:1-h23:0	Salad	39	16.78	16.87
A-NH2-t18:1-h23:0	Raspberry	39	16.89	16.85
A-NH2-t18:2-h25:0	Raspberry	39	17.71	17.73
A-NH2-t18:0-h22:0	Salad	40	16.82	16.76
A-NH2-t18:0-h22:0	Raspberry	40	16.64	16.55
A-NH2-t18:1-h24:0	Salad	40	18.52	18.44
A-NH2-t18:1-h24:0	Spinach	40	18.32	18.3
A-NH2-t18:1-h24:0	Raspberry	40	18.46	18.42
A-NH2-t18:0-h23:0	Raspberry	41	18.16	18.17
A-NH2-t18:1-h25:0	Raspberry	41	19.55	19.78
A-NH2-t18:0-h24:0	Raspberry	42	19.62	19.64
A-NH2-t18:0-h24:0	Salad	42	19.82	19.53
Composition	Plants	ECN	Rt neg (min)	Rt pos (min)
A-OH-t18:1-h16:0	Salad	32	8.14	8.13
A-OH-t18:1-h16:0	Strawberry	32	8.11	8.13
A-OH-t34:0	Raspberry	34	10.21	10.21
A-OH-t18:0-h16:0	Salad	34	8.84	8.83
A-OH-t18:1-h22:0	Salad	38	14.47	14.44
A-OH-t18:1-h22:0	Strawberry	38	14.25	14.43
A-OH-t18:1-h22:0	Raspberry	38	14.43	14.43
A-OH-t18:1-h24:1	Salad	38	14.36	14.33
A-OH-q42:2	Strawberry	38	15.21	15.22
A-OH-t18:2-h24:0	Raspberry	38	15.23	15.23
A-OH-t18:1-h23:0	Salad	39	15.85	15.84
A-OH-t18:1-h23:0	Strawberry	39	15.53	15.76
A-OH-t18:1-h23:0	Raspberry	39	15.82	15.77
A-OH-q40:0	Salad	40	15.66	15.6
A-OH-t18:0-h22:0	Raspberry	40	15.36	15.63
A-OH-t18:1-h24:0	Salad	40	17.3	17.26
A-OH-t18:1-h24:0	Strawberry	40	17.26	17
A-OH-t18:1-h24:0	Raspberry	40	17.25	17.23
A-OH-q41:0	Strawberry	41	17.01	16.98
A-OH-t18:1-h25:0	Salad	41	18.76	18.75
A-OH-t18:1-h25:0	Strawberry	41	18.42	18.48
A-OH-t18:1-h25:0	Raspberry	41	18.71	18.73
A-OH-t18:0-h24:0	Salad	42	18.55	18.5
A-OH-t18:0-h24:0	Strawberry	42	18.44	18.32
A-OH-t18:0-h24:0	Raspberry	42	18.51	18.53
A-OH-t18:1-h26:0	Salad	42	20.01	20.01
A-OH-t18:1-h26:0	Strawberry	42	19.76	19.94
A-OH-t18:0-h25:0	Strawberry	43	19.8	19.8
