# Supplementary material
Source: Preprints.org preprint supplement (doi:10.20944/preprints202009.0191.v1)
Supplement: Supplementary file 2 [file Table S2.xlsx]

## Sheet: GIPC_A_OH
								OH-Number: 3	OH-Range: 2-4	adductInsensitiveRtFilter
Name		dbs	C	H	O	P	N	mass(form[+H] name[H])	mass(form[+Na] name[Na])	tR (min)
33	:	0	51	96	23	1	1	1122.62	1144.6
33	:	1	51	94	23	1	1	1120.6	1142.58
33	:	2	51	92	23	1	1	1118.59	1140.57
33	:	3	51	90	23	1	1	1116.57	1138.55
34	:	0	52	98	23	1	1	1136.63	1158.62
34	:	1	52	96	23	1	1	1134.62	1156.6
34	:	2	52	94	23	1	1	1132.6	1154.58
34	:	3	52	92	23	1	1	1130.59	1152.57
35	:	0	53	100	23	1	1	1150.65	1172.63
35	:	1	53	98	23	1	1	1148.63	1170.62
35	:	2	53	96	23	1	1	1146.62	1168.6
35	:	3	53	94	23	1	1	1144.6	1166.58
36	:	0	54	102	23	1	1	1164.67	1186.65
36	:	1	54	100	23	1	1	1162.65	1184.63
36	:	2	54	98	23	1	1	1160.63	1182.62
36	:	3	54	96	23	1	1	1158.62	1180.6
37	:	0	55	104	23	1	1	1178.68	1200.66
37	:	1	55	102	23	1	1	1176.67	1198.65
37	:	2	55	100	23	1	1	1174.65	1196.63
37	:	3	55	98	23	1	1	1172.63	1194.62
38	:	0	56	106	23	1	1	1192.7	1214.68
38	:	1	56	104	23	1	1	1190.68	1212.66
38	:	2	56	102	23	1	1	1188.67	1210.65
38	:	3	56	100	23	1	1	1186.65	1208.63
39	:	0	57	108	23	1	1	1206.71	1228.69
39	:	1	57	106	23	1	1	1204.7	1226.68
39	:	2	57	104	23	1	1	1202.68	1224.66
39	:	3	57	102	23	1	1	1200.67	1222.65
40	:	0	58	110	23	1	1	1220.73	1242.71
40	:	1	58	108	23	1	1	1218.71	1240.69
40	:	2	58	106	23	1	1	1216.7	1238.68
40	:	3	58	104	23	1	1	1214.68	1236.66
41	:	0	59	112	23	1	1	1234.74	1256.73
41	:	1	59	110	23	1	1	1232.73	1254.71
41	:	2	59	108	23	1	1	1230.71	1252.69
41	:	3	59	106	23	1	1	1228.7	1250.68
42	:	0	60	114	23	1	1	1248.76	1270.74
42	:	1	60	112	23	1	1	1246.74	1268.73
42	:	2	60	110	23	1	1	1244.73	1266.71
42	:	3	60	108	23	1	1	1242.71	1264.69
43	:	0	61	116	23	1	1	1262.77	1284.76
43	:	1	61	114	23	1	1	1260.76	1282.74
43	:	2	61	112	23	1	1	1258.74	1280.73
43	:	3	61	110	23	1	1	1256.73	1278.71
44	:	0	62	118	23	1	1	1276.79	1298.77
44	:	1	62	116	23	1	1	1274.77	1296.76
44	:	2	62	114	23	1	1	1272.76	1294.74
44	:	3	62	112	23	1	1	1270.74	1292.73
45	:	0	63	120	23	1	1	1290.81	1312.79
45	:	1	63	118	23	1	1	1288.79	1310.77
45	:	2	63	116	23	1	1	1286.77	1308.76
45	:	3	63	114	23	1	1	1284.76	1306.74
46	:	0	64	122	23	1	1	1304.82	1326.8
46	:	1	64	120	23	1	1	1302.81	1324.79
46	:	2	64	118	23	1	1	1300.79	1322.77
46	:	3	64	116	23	1	1	1298.77	1320.76

## Sheet: GIPC_A_NAC
								OH-Number: 3	OH-Range: 2-4	adductInsensitiveRtFilter
Name		dbs	C	H	O	P	N	mass(form[+H] name[H])	mass(form[+Na] name[Na])	tR (min)
33	:	0	53	99	23	1	2	1163.64	1185.63
33	:	1	53	97	23	1	2	1161.63	1183.61
33	:	2	53	95	23	1	2	1159.61	1181.6
33	:	3	53	93	23	1	2	1157.6	1179.58
34	:	0	54	101	23	1	2	1177.66	1199.64
34	:	1	54	99	23	1	2	1175.64	1197.63
34	:	2	54	97	23	1	2	1173.63	1195.61
34	:	3	54	95	23	1	2	1171.61	1193.6
35	:	0	55	103	23	1	2	1191.68	1213.66
35	:	1	55	101	23	1	2	1189.66	1211.64
35	:	2	55	99	23	1	2	1187.64	1209.63
35	:	3	55	97	23	1	2	1185.63	1207.61
36	:	0	56	105	23	1	2	1205.69	1227.67
36	:	1	56	103	23	1	2	1203.68	1225.66
36	:	2	56	101	23	1	2	1201.66	1223.64
36	:	3	56	99	23	1	2	1199.64	1221.63
37	:	0	57	107	23	1	2	1219.71	1241.69
37	:	1	57	105	23	1	2	1217.69	1239.67
37	:	2	57	103	23	1	2	1215.68	1237.66
37	:	3	57	101	23	1	2	1213.66	1235.64
38	:	0	58	109	23	1	2	1233.72	1255.71
38	:	1	58	107	23	1	2	1231.71	1253.69
38	:	2	58	105	23	1	2	1229.69	1251.67
38	:	3	58	103	23	1	2	1227.68	1249.66
39	:	0	59	111	23	1	2	1247.74	1269.72
39	:	1	59	109	23	1	2	1245.72	1267.71
39	:	2	59	107	23	1	2	1243.71	1265.69
39	:	3	59	105	23	1	2	1241.69	1263.67
40	:	0	60	113	23	1	2	1261.75	1283.74
40	:	1	60	111	23	1	2	1259.74	1281.72
40	:	2	60	109	23	1	2	1257.72	1279.71
40	:	3	60	107	23	1	2	1255.71	1277.69
41	:	0	61	115	23	1	2	1275.77	1297.75
41	:	1	61	113	23	1	2	1273.75	1295.74
41	:	2	61	111	23	1	2	1271.74	1293.72
41	:	3	61	109	23	1	2	1269.72	1291.71
42	:	0	62	117	23	1	2	1289.79	1311.77
42	:	1	62	115	23	1	2	1287.77	1309.75
42	:	2	62	113	23	1	2	1285.75	1307.74
42	:	3	62	111	23	1	2	1283.74	1305.72
43	:	0	63	119	23	1	2	1303.8	1325.78
43	:	1	63	117	23	1	2	1301.79	1323.77
43	:	2	63	115	23	1	2	1299.77	1321.75
43	:	3	63	113	23	1	2	1297.75	1319.74
44	:	0	64	121	23	1	2	1317.82	1339.8
44	:	1	64	119	23	1	2	1315.8	1337.78
44	:	2	64	117	23	1	2	1313.79	1335.77
44	:	3	64	115	23	1	2	1311.77	1333.75
45	:	0	65	123	23	1	2	1331.83	1353.81
45	:	1	65	121	23	1	2	1329.82	1351.8
45	:	2	65	119	23	1	2	1327.8	1349.78
45	:	3	65	117	23	1	2	1325.79	1347.77
46	:	0	66	125	23	1	2	1345.85	1367.83
46	:	1	66	123	23	1	2	1343.83	1365.81
46	:	2	66	121	23	1	2	1341.82	1363.8
46	:	3	66	119	23	1	2	1339.8	1361.78

## Sheet: GIPC_A_NH
								OH-Number: 3	OH-Range: 2-4	adductInsensitiveRtFilter
Name		dbs	C	H	O	P	N	mass(form[+H] name[H])	mass(form[+Na] name[Na])	tR (min)
33	:	0	51	97	22	1	2	1121.63	1143.62
33	:	1	51	95	22	1	2	1119.62	1141.6
33	:	2	51	93	22	1	2	1117.6	1139.58
33	:	3	51	91	22	1	2	1115.59	1137.57
34	:	0	52	99	22	1	2	1135.65	1157.63
34	:	1	52	97	22	1	2	1133.63	1155.62
34	:	2	52	95	22	1	2	1131.62	1153.6
34	:	3	52	93	22	1	2	1129.6	1151.58
35	:	0	53	101	22	1	2	1149.67	1171.65
35	:	1	53	99	22	1	2	1147.65	1169.63
35	:	2	53	97	22	1	2	1145.63	1167.62
35	:	3	53	95	22	1	2	1143.62	1165.6
36	:	0	54	103	22	1	2	1163.68	1185.66
36	:	1	54	101	22	1	2	1161.67	1183.65
36	:	2	54	99	22	1	2	1159.65	1181.63
36	:	3	54	97	22	1	2	1157.63	1179.62
37	:	0	55	105	22	1	2	1177.7	1199.68
37	:	1	55	103	22	1	2	1175.68	1197.66
37	:	2	55	101	22	1	2	1173.67	1195.65
37	:	3	55	99	22	1	2	1171.65	1193.63
38	:	0	56	107	22	1	2	1191.71	1213.69
38	:	1	56	105	22	1	2	1189.7	1211.68
38	:	2	56	103	22	1	2	1187.68	1209.66
38	:	3	56	101	22	1	2	1185.67	1207.65
39	:	0	57	109	22	1	2	1205.73	1227.71
39	:	1	57	107	22	1	2	1203.71	1225.69
39	:	2	57	105	22	1	2	1201.7	1223.68
39	:	3	57	103	22	1	2	1199.68	1221.66
40	:	0	58	111	22	1	2	1219.74	1241.73
40	:	1	58	109	22	1	2	1217.73	1239.71
40	:	2	58	107	22	1	2	1215.71	1237.69
40	:	3	58	105	22	1	2	1213.7	1235.68
41	:	0	59	113	22	1	2	1233.76	1255.74
41	:	1	59	111	22	1	2	1231.74	1253.73
41	:	2	59	109	22	1	2	1229.73	1251.71
41	:	3	59	107	22	1	2	1227.71	1249.69
42	:	0	60	115	22	1	2	1247.78	1269.76
42	:	1	60	113	22	1	2	1245.76	1267.74
42	:	2	60	111	22	1	2	1243.74	1265.73
42	:	3	60	109	22	1	2	1241.73	1263.71
43	:	0	61	117	22	1	2	1261.79	1283.77
43	:	1	61	115	22	1	2	1259.78	1281.76
43	:	2	61	113	22	1	2	1257.76	1279.74
43	:	3	61	111	22	1	2	1255.74	1277.73
44	:	0	62	119	22	1	2	1275.81	1297.79
44	:	1	62	117	22	1	2	1273.79	1295.77
44	:	2	62	115	22	1	2	1271.78	1293.76
44	:	3	62	113	22	1	2	1269.76	1291.74
45	:	0	63	121	22	1	2	1289.82	1311.8
45	:	1	63	119	22	1	2	1287.81	1309.79
45	:	2	63	117	22	1	2	1285.79	1307.77
45	:	3	63	115	22	1	2	1283.78	1305.76
46	:	0	64	123	22	1	2	1303.84	1325.82
46	:	1	64	121	22	1	2	1301.82	1323.8
46	:	2	64	119	22	1	2	1299.81	1321.79
46	:	3	64	117	22	1	2	1297.79	1319.77
