# Supplementary material
Source: Preprints.org preprint supplement (doi:10.20944/preprints202009.0191.v1)
Supplement: Supplementary file 3 [file Table S3.xlsx]

## Sheet: GIPC_A_OH
							OH-Number: 3	OH-Range: 2-4	adductInsensitiveRtFilter
Name		dbs	C	H	O	P	N	mass(form[-H] name[-H])	tR (min)
33	:	0	51	96	23	1	1	1120.6
33	:	1	51	94	23	1	1	1118.59
33	:	2	51	92	23	1	1	1116.57
33	:	3	51	90	23	1	1	1114.56
34	:	0	52	98	23	1	1	1134.62
34	:	1	52	96	23	1	1	1132.6
34	:	2	52	94	23	1	1	1130.59
34	:	3	52	92	23	1	1	1128.57
35	:	0	53	100	23	1	1	1148.64
35	:	1	53	98	23	1	1	1146.62
35	:	2	53	96	23	1	1	1144.6
35	:	3	53	94	23	1	1	1142.59
36	:	0	54	102	23	1	1	1162.65
36	:	1	54	100	23	1	1	1160.64
36	:	2	54	98	23	1	1	1158.62
36	:	3	54	96	23	1	1	1156.6
37	:	0	55	104	23	1	1	1176.67
37	:	1	55	102	23	1	1	1174.65
37	:	2	55	100	23	1	1	1172.64
37	:	3	55	98	23	1	1	1170.62
38	:	0	56	106	23	1	1	1190.68
38	:	1	56	104	23	1	1	1188.67
38	:	2	56	102	23	1	1	1186.65
38	:	3	56	100	23	1	1	1184.64
39	:	0	57	108	23	1	1	1204.7
39	:	1	57	106	23	1	1	1202.68
39	:	2	57	104	23	1	1	1200.67
39	:	3	57	102	23	1	1	1198.65
40	:	0	58	110	23	1	1	1218.71
40	:	1	58	108	23	1	1	1216.7
40	:	2	58	106	23	1	1	1214.68
40	:	3	58	104	23	1	1	1212.67
41	:	0	59	112	23	1	1	1232.73
41	:	1	59	110	23	1	1	1230.71
41	:	2	59	108	23	1	1	1228.7
41	:	3	59	106	23	1	1	1226.68
42	:	0	60	114	23	1	1	1246.74
42	:	1	60	112	23	1	1	1244.73
42	:	2	60	110	23	1	1	1242.71
42	:	3	60	108	23	1	1	1240.7
43	:	0	61	116	23	1	1	1260.76
43	:	1	61	114	23	1	1	1258.74
43	:	2	61	112	23	1	1	1256.73
43	:	3	61	110	23	1	1	1254.71
44	:	0	62	118	23	1	1	1274.78
44	:	1	62	116	23	1	1	1272.76
44	:	2	62	114	23	1	1	1270.74
44	:	3	62	112	23	1	1	1268.73
45	:	0	63	120	23	1	1	1288.79
45	:	1	63	118	23	1	1	1286.78
45	:	2	63	116	23	1	1	1284.76
45	:	3	63	114	23	1	1	1282.74
46	:	0	64	122	23	1	1	1302.81
46	:	1	64	120	23	1	1	1300.79
46	:	2	64	118	23	1	1	1298.78
46	:	3	64	116	23	1	1	1296.76

## Sheet: GIPC_A_NAC
							OH-Number: 3	OH-Range: 2-4	adductInsensitiveRtFilter
Name		dbs	C	H	O	P	N	mass(form[-H] name[-H])	tR (min)
33	:	0	53	99	23	1	2	1161.63
33	:	1	53	97	23	1	2	1159.61
33	:	2	53	95	23	1	2	1157.6
33	:	3	53	93	23	1	2	1155.58
34	:	0	54	101	23	1	2	1175.65
34	:	1	54	99	23	1	2	1173.63
34	:	2	54	97	23	1	2	1171.61
34	:	3	54	95	23	1	2	1169.6
35	:	0	55	103	23	1	2	1189.66
35	:	1	55	101	23	1	2	1187.65
35	:	2	55	99	23	1	2	1185.63
35	:	3	55	97	23	1	2	1183.61
36	:	0	56	105	23	1	2	1203.68
36	:	1	56	103	23	1	2	1201.66
36	:	2	56	101	23	1	2	1199.65
36	:	3	56	99	23	1	2	1197.63
37	:	0	57	107	23	1	2	1217.69
37	:	1	57	105	23	1	2	1215.68
37	:	2	57	103	23	1	2	1213.66
37	:	3	57	101	23	1	2	1211.65
38	:	0	58	109	23	1	2	1231.71
38	:	1	58	107	23	1	2	1229.69
38	:	2	58	105	23	1	2	1227.68
38	:	3	58	103	23	1	2	1225.66
39	:	0	59	111	23	1	2	1245.72
39	:	1	59	109	23	1	2	1243.71
39	:	2	59	107	23	1	2	1241.69
39	:	3	59	105	23	1	2	1239.68
40	:	0	60	113	23	1	2	1259.74
40	:	1	60	111	23	1	2	1257.72
40	:	2	60	109	23	1	2	1255.71
40	:	3	60	107	23	1	2	1253.69
41	:	0	61	115	23	1	2	1273.76
41	:	1	61	113	23	1	2	1271.74
41	:	2	61	111	23	1	2	1269.72
41	:	3	61	109	23	1	2	1267.71
42	:	0	62	117	23	1	2	1287.77
42	:	1	62	115	23	1	2	1285.76
42	:	2	62	113	23	1	2	1283.74
42	:	3	62	111	23	1	2	1281.72
43	:	0	63	119	23	1	2	1301.79
43	:	1	63	117	23	1	2	1299.77
43	:	2	63	115	23	1	2	1297.76
43	:	3	63	113	23	1	2	1295.74
44	:	0	64	121	23	1	2	1315.8
44	:	1	64	119	23	1	2	1313.79
44	:	2	64	117	23	1	2	1311.77
44	:	3	64	115	23	1	2	1309.76
45	:	0	65	123	23	1	2	1329.82
45	:	1	65	121	23	1	2	1327.8
45	:	2	65	119	23	1	2	1325.79
45	:	3	65	117	23	1	2	1323.77
46	:	0	66	125	23	1	2	1343.83
46	:	1	66	123	23	1	2	1341.82
46	:	2	66	121	23	1	2	1339.8
46	:	3	66	119	23	1	2	1337.79

## Sheet: GIPC_A_NH
							OH-Number: 3	OH-Range: 2-4	adductInsensitiveRtFilter
Name		dbs	C	H	O	P	N	mass(form[-H] name[-H])	tR (min)
33	:	0	51	97	22	1	2	1119.62
33	:	1	51	95	22	1	2	1117.6
33	:	2	51	93	22	1	2	1115.59
33	:	3	51	91	22	1	2	1113.57
34	:	0	52	99	22	1	2	1133.64
34	:	1	52	97	22	1	2	1131.62
34	:	2	52	95	22	1	2	1129.6
34	:	3	52	93	22	1	2	1127.59
35	:	0	53	101	22	1	2	1147.65
35	:	1	53	99	22	1	2	1145.64
35	:	2	53	97	22	1	2	1143.62
35	:	3	53	95	22	1	2	1141.6
36	:	0	54	103	22	1	2	1161.67
36	:	1	54	101	22	1	2	1159.65
36	:	2	54	99	22	1	2	1157.64
36	:	3	54	97	22	1	2	1155.62
37	:	0	55	105	22	1	2	1175.68
37	:	1	55	103	22	1	2	1173.67
37	:	2	55	101	22	1	2	1171.65
37	:	3	55	99	22	1	2	1169.64
38	:	0	56	107	22	1	2	1189.7
38	:	1	56	105	22	1	2	1187.68
38	:	2	56	103	22	1	2	1185.67
38	:	3	56	101	22	1	2	1183.65
39	:	0	57	109	22	1	2	1203.71
39	:	1	57	107	22	1	2	1201.7
39	:	2	57	105	22	1	2	1199.68
39	:	3	57	103	22	1	2	1197.67
40	:	0	58	111	22	1	2	1217.73
40	:	1	58	109	22	1	2	1215.71
40	:	2	58	107	22	1	2	1213.7
40	:	3	58	105	22	1	2	1211.68
41	:	0	59	113	22	1	2	1231.74
41	:	1	59	111	22	1	2	1229.73
41	:	2	59	109	22	1	2	1227.71
41	:	3	59	107	22	1	2	1225.7
42	:	0	60	115	22	1	2	1245.76
42	:	1	60	113	22	1	2	1243.74
42	:	2	60	111	22	1	2	1241.73
42	:	3	60	109	22	1	2	1239.71
43	:	0	61	117	22	1	2	1259.78
43	:	1	61	115	22	1	2	1257.76
43	:	2	61	113	22	1	2	1255.74
43	:	3	61	111	22	1	2	1253.73
44	:	0	62	119	22	1	2	1273.79
44	:	1	62	117	22	1	2	1271.78
44	:	2	62	115	22	1	2	1269.76
44	:	3	62	113	22	1	2	1267.74
45	:	0	63	121	22	1	2	1287.81
45	:	1	63	119	22	1	2	1285.79
45	:	2	63	117	22	1	2	1283.78
45	:	3	63	115	22	1	2	1281.76
46	:	0	64	123	22	1	2	1301.82
46	:	1	64	121	22	1	2	1299.81
46	:	2	64	119	22	1	2	1297.79
46	:	3	64	117	22	1	2	1295.78
